# Supplementary material for: When a tree falls: Controls on wood decay predict standing dead tree fall and new risks in changing forests
Source: PLoS One. 2018 May 9;13(5):e0196712. doi: 10.1371/journal.pone.0196712 (PMC5942820; doi:10.1371/journal.pone.0196712)
Supplement: S2 Table — The set of parameters selected via backwards elimination from the fully hierarchical model is indicated in bold. (XLSX) [file pone.0196712.s009.xlsx]

## Sheet: Supplementary Dataset 2
Decay Class 1								Decay Class 2				Decay Class 3						Decay Class 4						Decay Class 5						All Snags
Model for AIC	df	AIC	Model for BIC	df	BIC	Model for AIC	df	AIC	Model for BIC	df	BIC	Model for AIC	df	AIC	Model for BIC	df	BIC	Model for AIC	df	AIC	Model for BIC	df	BIC	Model for AIC	df	AIC	Model for BIC	df	BIC	Model for AIC	df	AIC	Model for BIC	df	BIC
DIA+TPH+AT	321	16058.5	DIA+TPH+AT	321	18486.7	DIA+TPH+QMD+WND+AT	331	22597.2	DIA+TPH+AT	329	25193	DIA+TPH+QMD+AT	341	34349.8	DIA+TPH+AT	340	37158.7	DIA+TPH+QMD+AT	334	31139.5	DIA+TPH+AT	333	33846.7	DIA+TPH+QMD+AT	314	14838.5	DIA+AT	312	17147.1	DIA+TPH+QMD+WND+AT	375	120939	DIA+TPH+AT	373	124486
DIA+TPH+QMD+AT	322	16060.1	DIA+TPH+QMD+AT	322	18495.9	DIA+TPH+WND+AT	330	22598.4	DIA+TPH+WND+AT	330	25199.1	DIA+TPH+QMD+SL+AT	342	34350.3	DIA+TPH+QMD+AT	341	37164.6	DIA+TPH+AT	333	31140.5	DIA+AT	332	33848.2	DIA+TPH+AT	313	14839	DIA+TPH+AT	313	17152.5	DIA+TPH+QMD+AT	374	120940	DIA+TPH+QMD+AT	374	124494
DIA+TPH+SL+AT	322	16060.4	DIA+TPH+SL+AT	322	18496.2	TPH+QMD+SL+WND+AT+DIA	332	22598.9	DIA+TPH+QMD+AT	330	25199.7	DIA+TPH+QMD+WND+AT	342	34351.8	DIA+TPH+SL+AT	341	37167.4	DIA+TPH+QMD+SL+AT	335	31140.7	DIA+TPH+QMD+AT	334	33853.8	DIA+TPH+QMD+SL+AT	315	14839	DIA+SL+AT	313	17155	DIA+TPH+WND+AT	374	120940	DIA+TPH+WND+AT	374	124495
DIA+TPH+WND+AT	322	16060.4	DIA+TPH+WND+AT	322	18496.2	DIA+TPH+QMD+AT	330	22599	DIA+TPH+SL+AT	330	25202.6	DIA+TPH+AT	340	34352.1	DIA+TPH+WND+AT	341	37168.9	DIA+TPH+QMD+WND+AT	335	31141	DIA+TPH+SL+AT	334	33856	DIA+TPH+SL+AT	314	14839.4	DIA+WND+AT	313	17155.3	TPH+QMD+SL+WND+AT+DIA	376	120941	DIA+TPH+SL+AT	374	124497
DIA+TPH+QMD+SL+AT	323	16062	DIA+TPH+QMD+SL+AT	323	18505.4	DIA+TPH+SL+WND+AT	331	22600.1	DIA+TPH+QMD+WND+AT	331	25205.8	TPH+QMD+SL+WND+AT+DIA	343	34352.3	DIA+TPH+QMD+SL+AT	342	37173.4	DIA+TPH+SL+AT	334	31141.6	DIA+TPH+WND+AT	334	33856.5	DIA+TPH+QMD+WND+AT	315	14839.5	DIA+QMD+AT	313	17156.3	DIA+TPH+AT	373	120941	DIA+TPH+QMD+WND+AT	375	124504
DIA+TPH+QMD+WND+AT	323	16062	DIA+TPH+QMD+WND+AT	323	18505.4	DIA+TPH+AT	329	22600.2	DIA+TPH+SL+WND+AT	331	25208.7	DIA+TPH+SL+AT	341	34352.6	DIA+TPH+QMD+WND+AT	342	37174.8	DIA+TPH+WND+AT	334	31142.1	DIA+SL+AT	333	33857.3	TPH+QMD+SL+WND+AT+DIA	316	14839.8	DIA+TPH+QMD+AT	314	17159.5	DIA+TPH+QMD+SL+AT	375	120941	DIA+TPH+QMD+SL+AT	375	124505
DIA+TPH+SL+WND+AT	323	16062.4	DIA+TPH+SL+WND+AT	323	18505.7	DIA+TPH+QMD+SL+AT	331	22600.8	DIA+QMD+AT	329	25208.8	DIA+TPH+WND+AT	341	34354.1	DIA+TPH+SL+WND+AT	342	37177.7	TPH+QMD+SL+WND+AT+DIA	336	31142.3	DIA+WND+AT	333	33858	DIA+TPH+WND+AT	314	14839.9	DIA+TPH+SL+AT	314	17160.4	DIA+TPH+SL+WND+AT	375	120942	DIA+TPH+SL+WND+AT	375	124506
TPH+QMD+SL+WND+AT+DIA	324	16064	DIA+AT	320	18513.2	DIA+TPH+SL+AT	330	22602	DIA+TPH+QMD+SL+AT	331	25209.3	DIA+TPH+SL+WND+AT	342	34354.6	TPH+QMD+SL+WND+AT+DIA	343	37183.6	DIA+TPH+SL+WND+AT	335	31143.3	DIA+QMD+AT	333	33858.3	DIA+TPH+SL+WND+AT	315	14840.2	DIA+TPH+WND+AT	314	17160.8	DIA+TPH+SL+AT	374	120942	TPH+QMD+SL+WND+AT+DIA	376	124514
DIA+QMD+AT	321	16089.8	TPH+QMD+SL+WND+AT+DIA	324	18514.9	DIA+QMD+WND+AT	330	22614.4	DIA+QMD+WND+AT	330	25215.1	DIA+AT	339	34395.6	DIA+AT	339	37193.9	DIA+AT	332	31150.1	DIA+TPH+QMD+SL+AT	335	33863.2	DIA+AT	312	14840.9	DIA+SL+WND+AT	314	17163.2	DIA+QMD+WND+AT	374	121078	DIA+QMD+AT	373	124624
DIA+QMD+SL+AT	322	16091.8	DIA+QMD+AT	321	18518.1	DIA+QMD+AT	329	22616	TPH+QMD+SL+WND+AT+DIA	332	25215.4	DIA+SL+AT	340	34395.9	DIA+SL+AT	340	37202.5	DIA+SL+AT	333	31151	DIA+TPH+QMD+WND+AT	335	33863.6	DIA+SL+AT	313	14841.5	DIA+QMD+SL+AT	314	17164.2	DIA+QMD+AT	373	121078	DIA+AT	372	124628
DIA+QMD+WND+AT	322	16091.8	DIA+SL+AT	321	18522.8	DIA+QMD+SL+WND+AT	331	22616.2	DIA+AT	328	25217.2	DIA+QMD+AT	340	34396.6	DIA+QMD+AT	340	37203.2	DIA+WND+AT	333	31151.7	DIA+TPH+SL+WND+AT	335	33865.8	DIA+WND+AT	313	14841.7	DIA+QMD+WND+AT	314	17164.5	DIA+QMD+SL+WND+AT	375	121079	DIA+QMD+WND+AT	374	124633
DIA+AT	320	16092.6	DIA+WND+AT	321	18522.8	DIA+QMD+SL+AT	330	22617.8	DIA+QMD+SL+AT	330	25218.5	DIA+QMD+SL+AT	341	34396.9	DIA+WND+AT	340	37204.2	DIA+QMD+AT	333	31152.1	DIA+SL+WND+AT	334	33867.1	DIA+SL+WND+AT	314	14842.2	DIA+TPH+QMD+SL+AT	315	17167.4	DIA+QMD+SL+AT	374	121079	DIA+QMD+SL+AT	374	124634
DIA+QMD+SL+WND+AT	323	16093.8	DIA+QMD+SL+AT	322	18527.6	DIA+WND+AT	329	22630.7	DIA+WND+AT	329	25223.5	DIA+WND+AT	340	34397.6	DIA+QMD+SL+AT	341	37211.7	DIA+SL+WND+AT	334	31152.7	DIA+QMD+SL+AT	334	33867.4	DIA+QMD+AT	313	14842.7	DIA+TPH+QMD+WND+AT	315	17167.9	DIA+WND+AT	373	121092	DIA+WND+AT	373	124637
DIA+SL+AT	321	16094.5	DIA+QMD+WND+AT	322	18527.6	DIA+AT	328	22632.2	DIA+QMD+SL+WND+AT	331	25224.8	DIA+SL+WND+AT	341	34397.9	DIA+SL+WND+AT	341	37212.7	DIA+QMD+SL+AT	334	31153	DIA+QMD+WND+AT	334	33868.1	DIA+QMD+SL+AT	314	14843.3	DIA+TPH+SL+WND+AT	315	17168.6	DIA+AT	372	121092	DIA+SL+AT	373	124638
DIA+WND+AT	321	16094.5	DIA+SL+WND+AT	322	18532.3	DIA+SL+WND+AT	330	22632.5	DIA+SL+AT	329	25226.8	DIA+QMD+WND+AT	341	34398.6	DIA+QMD+WND+AT	341	37213.4	DIA+QMD+WND+AT	334	31153.7	TPH+QMD+SL+WND+AT+DIA	336	33872.9	DIA+QMD+WND+AT	314	14843.5	DIA	311	17169.5	DIA+SL+WND+AT	374	121093	DIA+QMD+SL+WND+AT	375	124643
DIA+SL+WND+AT	322	16096.5	DIA+QMD+SL+WND+AT	323	18537.1	DIA+SL+AT	329	22634	DIA+SL+WND+AT	330	25233.2	DIA+QMD+SL+WND+AT	342	34398.9	DIA+QMD+SL+WND+AT	342	37221.9	DIA+QMD+SL+WND+AT	335	31154.7	DIA+QMD+SL+WND+AT	335	33877.2	DIA+QMD+SL+WND+AT	315	14844.1	DIA+WND	312	17172.4	DIA+SL+AT	373	121093	DIA+SL+WND+AT	374	124648
DIA+TPH+WND	321	16120.8	DIA+TPH	320	18543.4	DIA+TPH+QMD+WND	330	22641.6	DIA+TPH+WND	329	25236	DIA+TPH+QMD+SL+WND	342	34435.5	DIA+TPH	339	37241.9	DIA+TPH+QMD+WND	334	31222.6	DIA+TPH+WND	333	33929.7	DIA+TPH+QMD+WND	314	14863.7	DIA+QMD+SL+WND+AT	315	17172.4	DIA+TPH+QMD+SL+WND	375	121204	DIA+TPH+WND	373	124750
DIA+TPH+QMD+WND	322	16122.4	DIA+TPH+WND	321	18549	DIA+TPH+WND	329	22643.2	DIA+TPH+QMD+WND	330	25242.3	DIA+TPH+QMD+WND	341	34436.1	DIA+TPH+WND	340	37244.8	DIA+TPH+QMD+SL+WND	335	31222.9	DIA+TPH	332	33930.2	DIA+TPH+WND	313	14864	DIA+TPH	312	17174.5	DIA+TPH+SL+WND	374	121204	DIA+TPH+SL+WND	374	124759
DIA+TPH	320	16122.8	DIA+TPH+QMD	321	18552.6	DIA+TPH+QMD+SL+WND	331	22643.6	DIA+TPH	328	25242.3	DIA+TPH+SL+WND	341	34437.6	DIA+TPH+QMD	340	37248	DIA+TPH+WND	333	31223.4	DIA+WND	332	33936.4	DIA+TPH+QMD+SL+WND	315	14864.7	TPH+QMD+SL+WND+AT+DIA	316	17175.6	DIA+TPH+QMD+WND	374	121204	DIA+TPH+QMD+WND	374	124759
DIA+TPH+SL+WND	322	16122.8	DIA+TPH+SL	321	18553	DIA+TPH+SL+WND	330	22645.2	DIA+TPH+SL+WND	330	25245.9	DIA+TPH+WND	340	34438.2	DIA+TPH+SL	340	37249.5	DIA+TPH+SL+WND	334	31223.6	DIA+TPH+QMD+WND	334	33937	DIA+TPH+SL+WND	314	14865	DIA+TPH+WND	313	17177.5	DIA+TPH+WND	373	121205	DIA+TPH+QMD+SL+WND	375	124768
DIA+TPH+QMD	321	16124.4	DIA+TPH+QMD+WND	322	18558.2	DIA+TPH+QMD	329	22655.7	DIA+TPH+QMD	329	25248.5	DIA+TPH+QMD+SL	341	34440.8	DIA+TPH+QMD+WND	341	37250.9	DIA+TPH+QMD+SL	334	31231.4	DIA	331	33937.3	DIA+WND	312	14866.2	DIA+SL	312	17178.3	DIA+TPH+QMD+SL	374	121240	DIA+TPH	372	124778
DIA+TPH+QMD+SL+WND	323	16124.4	DIA+TPH+SL+WND	322	18558.6	DIA+TPH	328	22657.4	DIA+TPH+QMD+SL+WND	331	25252.2	DIA+TPH+QMD	340	34441.4	DIA+TPH+SL+WND	341	37252.5	DIA+TPH+QMD	333	31231.5	DIA+TPH+QMD	333	33937.7	DIA+SL+WND	313	14867.4	DIA+QMD	312	17178.8	DIA+TPH+SL	373	121241	DIA+TPH+SL	373	124786
DIA+TPH+SL	321	16124.8	DIA+TPH+QMD+SL	322	18562.2	DIA+TPH+QMD+SL	330	22657.7	DIA+TPH+SL	329	25252.2	DIA+TPH+SL	340	34442.9	DIA+TPH+QMD+SL	341	37255.6	DIA+TPH+SL	333	31231.9	DIA+TPH+SL+WND	334	33938	DIA+TPH+QMD	313	14868	DIA+SL+WND	313	17181	DIA+TPH+QMD	373	121242	DIA+TPH+QMD	373	124787
DIA+TPH+QMD+SL	322	16126.4	DIA+TPH+QMD+SL+WND	323	18567.8	DIA+TPH+SL	329	22659.4	DIA+QMD+WND	329	25256.3	DIA+TPH	339	34443.6	DIA+TPH+QMD+SL+WND	342	37258.6	DIA+TPH	332	31232.1	DIA+TPH+SL	333	33938.2	DIA+QMD+WND	313	14868.1	DIA+TPH+QMD	313	17181.5	DIA+TPH	372	121242	DIA+TPH+QMD+SL	374	124795
DIA+QMD+WND	321	16157	DIA	319	18576.4	DIA+QMD+WND	329	22663.5	DIA+TPH+QMD+SL	330	25258.4	DIA+SL+WND	340	34491.3	DIA	338	37288	DIA+SL+WND	333	31238.1	DIA+SL+WND	333	33944.3	DIA+TPH	312	14868.3	DIA+QMD+WND	313	17181.7	DIA+QMD+SL+WND	374	121364	DIA+QMD+WND	373	124912
DIA+QMD+SL+WND	322	16159	DIA+QMD	320	18580.1	DIA+QMD+SL+WND	330	22665.4	DIA+QMD	328	25262.7	DIA+QMD+SL+WND	341	34491.3	DIA+WND	339	37290.7	DIA+WND	332	31238.3	DIA+SL	332	33944.8	DIA+TPH+QMD+SL	314	14869.2	DIA+TPH+SL	313	17183.2	DIA+QMD+WND	373	121367	DIA+QMD+SL+WND	374	124919
DIA+QMD	320	16159.5	DIA+WND	320	18581.7	DIA+QMD	328	22677.8	DIA+QMD+SL+WND	330	25266.1	DIA+WND	339	34492.4	DIA+SL	339	37295	DIA+QMD+SL+WND	334	31239.9	DIA+TPH+QMD+SL+WND	335	33945.4	DIA+QMD+SL+WND	314	14869.2	DIA+TPH+QMD+WND	314	17184.7	DIA+SL+WND	373	121384	DIA+WND	372	124922
DIA+WND	320	16161	DIA+QMD+WND	321	18585.3	DIA+QMD+SL	329	22679.8	DIA+WND	328	25268.3	DIA+QMD+WND	340	34492.4	DIA+QMD	339	37296.3	DIA+QMD+WND	333	31240.2	DIA+TPH+QMD+SL	334	33945.8	DIA+TPH+SL	313	14869.6	DIA+TPH+SL+WND	314	17186	DIA+WND	372	121386	DIA+SL+WND	373	124929
DIA+QMD+SL	321	16161.4	DIA+SL	320	18586	DIA+WND	328	22683.4	DIA+QMD+SL	329	25272.6	DIA+SL	339	34496.7	DIA+SL+WND	340	37297.8	DIA+SL	332	31246.7	DIA+QMD+WND	333	33946.4	DIA	311	14870.7	DIA+QMD+SL	313	17187.6	DIA+QMD+SL	373	121402	DIA+QMD	372	124941
DIA+SL+WND	321	16163	DIA+QMD+SL	321	18589.7	DIA+SL+WND	329	22685.4	DIA	327	25275.2	DIA+QMD+SL	340	34496.8	DIA+QMD+WND	340	37299	DIA	331	31247.3	DIA+QMD	332	33947.2	DIA+SL	312	14872.1	DIA+TPH+QMD+SL	314	17190.2	DIA+QMD	372	121405	DIA+QMD+SL	373	124947
DIA	319	16163.3	DIA+SL+WND	321	18591.2	DIA	327	22698.1	DIA+SL+WND	329	25278.2	DIA	338	34498	DIA+QMD+SL	340	37303.4	DIA+QMD+SL	333	31248.5	DIA+QMD+SL+WND	334	33954.3	DIA+QMD	312	14872.6	DIA+QMD+SL+WND	314	17190.2	DIA+SL	372	121422	DIA	371	124951
DIA+SL	320	16165.3	DIA+QMD+SL+WND	322	18594.8	DIA+SL	328	22700.1	DIA+SL	328	25285	DIA+QMD	339	34498	DIA+QMD+SL+WND	341	37306.2	DIA+QMD	332	31249.1	DIA+QMD+SL	333	33954.7	DIA+QMD+SL	313	14874	DIA+TPH+QMD+SL+WND	315	17193.1	DIA	371	121424	DIA+SL	372	124957
TPH+QMD+AT	321	16683.5	AT	319	19104.5	TPH+WND+AT	329	23476.3	AT	327	26057.1	TPH+QMD+SL+AT	341	35364.5	AT	338	38168.9	TPH+QMD+AT	333	31805.2	AT	331	34498.9	TPH+QMD+AT	313	15093	AT	311	17392.3	TPH+QMD+SL+WND+AT	375	123812	TPH+QMD+AT	373	127360
AT+TPH	320	16684.5	AT+TPH	320	19105.2	AT+WND	328	23477.8	AT+WND	328	26062.7	TPH+QMD+AT	340	35366.4	AT+TPH	339	38172.2	TPH+QMD+SL+AT	334	31805.7	AT+QMD	332	34504.4	AT+QMD	312	15093.5	AT+QMD	312	17399.7	TPH+QMD+WND+AT	374	123813	AT+TPH	372	127364
TPH+QMD+WND+AT	322	16685.5	TPH+QMD+AT	321	19111.8	TPH+QMD+WND+AT	330	23478.2	AT+TPH	328	26063.6	TPH+QMD+SL+WND+AT	342	35366.5	TPH+QMD+AT	340	38172.9	TPH+QMD+WND+AT	334	31806.2	AT+SL	332	34507.3	AT	311	15093.5	AT+WND	312	17400.9	TPH+QMD+SL+AT	374	123814	TPH+QMD+WND+AT	374	127368
TPH+QMD+SL+AT	322	16685.5	AT+WND	320	19114	TPH+SL+WND+AT	330	23478.3	AT+QMD	328	26065.8	TPH+QMD+WND+AT	341	35368.3	AT+SL	339	38175.1	AT+QMD	332	31806.2	AT+WND	332	34508	TPH+QMD+WND+AT	314	15094.2	AT+SL	312	17401.2	TPH+QMD+AT	373	123815	TPH+QMD+SL+AT	374	127369
TPH+WND+AT	321	16686.4	AT+QMD	320	19114.1	QMD+WND+AT	329	23478.6	AT+SL	328	26067	TPH+SL+AT	340	35372	AT+QMD	339	38176.5	QMD+SL+AT	333	31806.6	AT+TPH	332	34508.7	TPH+QMD+SL+AT	314	15094.4	AT+TPH	312	17401.2	TPH+SL+WND+AT	374	123825	TPH+WND+AT	373	127372
TPH+SL+AT	321	16686.5	AT+SL	320	19114.1	AT+TPH	328	23478.7	TPH+WND+AT	329	26069.1	AT+TPH	339	35373.9	TPH+SL+AT	340	38178.6	TPH+QMD+SL+WND+AT	335	31806.7	TPH+QMD+AT	333	34511.5	QMD+WND+AT	313	15094.7	TPH+QMD+AT	313	17406.6	TPH+WND+AT	373	123826	TPH+SL+AT	373	127373
TPH+QMD+SL+WND+AT	323	16687.4	TPH+WND+AT	321	19114.7	SL+WND+AT	329	23479.8	QMD+WND+AT	329	26071.4	TPH+SL+WND+AT	341	35373.9	AT+WND	339	38179.1	QMD+WND+AT	333	31807.2	QMD+SL+AT	333	34512.8	AT+WND	312	15094.7	QMD+WND+AT	313	17408.3	TPH+SL+AT	373	123827	TPH+QMD+SL+WND+AT	375	127377
TPH+SL+WND+AT	322	16688.4	TPH+SL+AT	321	19114.7	AT	327	23480	SL+WND+AT	329	26072.6	TPH+WND+AT	340	35375.8	TPH+QMD+SL+AT	341	38179.4	QMD+SL+WND+AT	334	31807.6	QMD+WND+AT	333	34513.5	QMD+SL+AT	313	15094.9	QMD+SL+AT	313	17408.5	AT+TPH	372	123828	TPH+SL+WND+AT	374	127380
AT	319	16691.4	TPH+QMD+WND+AT	322	19121.3	TPH+QMD+SL+WND+AT	331	23480.2	TPH+QMD+AT	329	26073.4	QMD+SL+AT	340	35376.2	TPH+WND+AT	340	38182.4	AT	331	31808.9	SL+WND+AT	333	34516.5	AT+SL	312	15095	SL+WND+AT	313	17409.7	SL+WND+AT	373	123858	AT	371	127387
AT+WND	320	16693.3	TPH+QMD+SL+AT	322	19121.3	TPH+QMD+AT	329	23480.6	TPH+SL+AT	329	26073.5	AT+SL	339	35376.8	QMD+SL+AT	340	38182.8	AT+SL	332	31809.2	TPH+SL+AT	333	34517.2	AT+TPH	312	15095	TPH+WND+AT	313	17409.8	QMD+SL+WND+AT	374	123859	AT+WND	372	127395
AT+QMD	320	16693.4	QMD+WND+AT	321	19123.5	QMD+SL+WND+AT	330	23480.6	QMD+SL+AT	329	26075.7	QMD+SL+WND+AT	341	35378.2	TPH+QMD+WND+AT	341	38183.1	AT+WND	332	31809.9	TPH+WND+AT	333	34517.8	TPH+QMD+SL+WND+AT	315	15095.5	TPH+SL+AT	313	17410	AT+WND	372	123859	AT+SL	372	127395
AT+SL	320	16693.4	SL+WND+AT	321	19123.5	TPH+SL+AT	329	23480.7	TPH+QMD+WND+AT	330	26078.9	AT+QMD	339	35378.2	SL+WND+AT	340	38185.3	SL+WND+AT	333	31810.2	TPH+QMD+SL+AT	334	34520.1	SL+WND+AT	313	15096.1	TPH+QMD+WND+AT	314	17415.2	AT+SL	372	123859	AT+QMD	372	127398
QMD+WND+AT	321	16695.3	QMD+SL+AT	321	19123.6	AT+QMD	328	23480.9	TPH+SL+WND+AT	330	26079	SL+WND+AT	340	35378.8	QMD+WND+AT	340	38186.7	AT+TPH	332	31810.5	TPH+QMD+WND+AT	334	34520.6	QMD+SL+WND+AT	314	15096.1	TPH+QMD+SL+AT	314	17415.4	QMD+WND+AT	373	123860	SL+WND+AT	373	127403
SL+WND+AT	321	16695.3	TPH+SL+WND+AT	322	19124.2	AT+SL	328	23482	QMD+SL+WND+AT	330	26081.3	AT	338	35378.8	TPH+SL+WND+AT	341	38188.8	TPH+SL+AT	333	31810.9	QMD+SL+WND+AT	334	34522	TPH+WND+AT	313	15096.2	Null	310	17415.4	QMD+SL+AT	373	123860	QMD+WND+AT	373	127406
QMD+SL+AT	321	16695.4	TPH+QMD+SL+WND+AT	323	19130.8	TPH+QMD+SL+AT	330	23482.6	TPH+QMD+SL+AT	330	26083.3	QMD+WND+AT	340	35380.2	TPH+QMD+SL+WND+AT	342	38189.6	TPH+WND+AT	333	31811.6	TPH+SL+WND+AT	334	34526.4	TPH+SL+AT	313	15096.4	QMD+SL+WND+AT	314	17417	AT	371	123861	QMD+SL+AT	373	127406
QMD+SL+WND+AT	322	16697.3	QMD+SL+WND+AT	322	19133.1	QMD+SL+AT	329	23482.9	TPH+QMD+SL+WND+AT	331	26088.8	AT+WND	339	35380.8	QMD+SL+WND+AT	341	38193	TPH+SL+WND+AT	334	31812	TPH+QMD+SL+WND+AT	335	34529.2	TPH+SL+WND+AT	314	15097.5	TPH+SL+WND+AT	314	17418.5	AT+QMD	372	123862	QMD+SL+WND+AT	374	127414
TPH+QMD+WND	321	16740.6	TPH	319	19158.2	TPH+WND	328	23523.9	WND	327	26105.3	TPH+QMD+SL+WND	341	35452.2	TPH	338	38260.7	TPH+QMD+SL+WND	334	31888.7	WND	331	34584.1	TPH+QMD+WND	313	15119.6	WND	311	17418.8	TPH+QMD+SL+WND	374	124083	TPH+QMD+WND	373	127633
TPH+WND	320	16741.5	Null	318	19160.6	TPH+QMD+WND	329	23525.8	TPH+WND	328	26108.8	TPH+QMD+WND	340	35455.7	TPH+WND	339	38261.3	TPH+QMD+WND	333	31889.6	Null	330	34587.7	WND	311	15120	QMD	311	17423	TPH+QMD+WND	373	124087	TPH+WND	372	127635
TPH+QMD+SL+WND	322	16742.6	TPH+WND	320	19162.1	TPH+SL+WND	329	23525.8	QMD+WND	328	26112.8	TPH+SL+WND	340	35459.3	QMD+TPH	339	38261.6	QMD+SL+WND	333	31891.7	QMD+WND	332	34591.1	QMD+WND	312	15120.3	TPH+QMD+SL+WND+AT	315	17423.9	TPH+SL+WND	373	124094	TPH+QMD+SL+WND	374	127638
TPH+SL+WND	321	16743.4	WND	319	19164.4	TPH+QMD+SL+WND	330	23527.6	Null	326	26113.2	TPH+QMD+SL	340	35459.6	Null	337	38261.9	QMD+WND	332	31892.9	SL+WND	332	34591.1	TPH+QMD+SL+WND	314	15121.3	TPH	311	17424	TPH+WND	372	124099	TPH+SL+WND	373	127640
QMD+TPH	320	16744.1	QMD+TPH	320	19164.8	QMD+WND	328	23527.9	SL+WND	328	26115	TPH+WND	339	35462.9	TPH+QMD+WND	340	38262.3	SL+WND	332	31892.9	TPH+WND	332	34592.7	TPH+WND	312	15121.4	SL	311	17424.7	TPH+QMD+SL	373	124126	QMD+TPH	372	127667
TPH	319	16745.1	SL+TPH	320	19167.7	WND	327	23528.2	TPH	327	26116.6	QMD+TPH	339	35463.3	WND	338	38262.4	TPH+SL+WND	333	31893.6	SL	331	34594.1	SL+WND	312	15121.8	QMD+WND	312	17426.5	QMD+TPH	372	124131	TPH	371	127670
TPH+QMD+SL	321	16746.1	TPH+QMD+WND	321	19168.8	QMD+SL+WND	329	23529.7	TPH+QMD+WND	329	26118.6	SL+TPH	339	35466.8	SL+TPH	339	38265.1	WND	331	31894.1	QMD	331	34594.9	QMD+SL+WND	313	15122	TPH+WND	312	17427.6	SL+TPH	372	124137	TPH+QMD+SL	373	127671
SL+TPH	320	16747.1	SL	319	19170.1	SL+WND	328	23530	TPH+SL+WND	329	26118.6	SL+WND	339	35468.5	TPH+SL+WND	340	38265.9	TPH+WND	332	31894.6	TPH+QMD+WND	333	34595.8	TPH+SL+WND	313	15123.1	SL+WND	312	17428	SL+WND	372	124140	WND	371	127672
WND	319	16751.3	QMD	319	19170.2	TPH	327	23539.5	QMD	327	26120.7	QMD+SL+WND	340	35468.9	SL	338	38266	TPH+QMD+SL	333	31900.1	TPH	331	34596.2	QMD+TPH	312	15123.3	QMD+TPH	312	17429.5	QMD+SL+WND	373	124142	SL+TPH	372	127673
SL+WND	320	16753.3	TPH+SL+WND	321	19171.7	SL+TPH	328	23541.3	QMD+SL+WND	329	26122.5	TPH	338	35470.6	TPH+QMD+SL	340	38266.2	QMD+TPH	332	31901.5	QMD+SL+WND	333	34598	Null	310	15124	QMD+SL	312	17432.2	TPH	371	124143	SL+WND	372	127676
QMD+WND	320	16753.3	SL+WND	320	19173.9	QMD+TPH	328	23541.3	SL	327	26122.8	WND	338	35472.3	SL+WND	339	38266.8	QMD+SL	332	31903.2	QMD+TPH	332	34599.6	QMD	311	15124.2	TPH+QMD+WND	313	17433.2	WND	371	124146	QMD+WND	372	127684
Null	318	16755.1	QMD+WND	320	19174	TPH+QMD+SL	329	23543.1	SL+TPH	328	26126.2	QMD+WND	339	35472.8	TPH+QMD+SL+WND	341	38267	SL	331	31904.1	TPH+SL+WND	333	34599.8	TPH+QMD+SL	313	15125.1	SL+TPH	312	17433.3	QMD+WND	372	124148	QMD+SL+WND	373	127688
QMD+SL+WND	321	16755.2	TPH+QMD+SL	321	19174.3	QMD	327	23543.6	QMD+TPH	328	26126.3	SL	338	35475.9	QMD	338	38270.6	SL+TPH	332	31904.7	QMD+SL	332	34601.3	TPH	311	15125.2	QMD+SL+WND	313	17435.6	SL	371	124184	Null	370	127708
SL	319	16757	TPH+QMD+SL+WND	322	19178.4	Null	326	23544	TPH+QMD+SL+WND	330	26128.3	QMD+SL	339	35476.4	QMD+WND	339	38271.1	QMD	331	31904.9	SL+TPH	332	34602.8	SL	311	15125.9	TPH+SL+WND	313	17436.7	QMD+SL	372	124186	SL	371	127710
QMD	319	16757.1	QMD+SL	320	19179.7	QMD+SL	328	23545.3	QMD+SL	328	26130.2	Null	337	35480.1	QMD+SL	339	38274.7	Null	330	31905.8	TPH+QMD+SL+WND	334	34603.1	QMD+SL	312	15126	TPH+QMD+SL	313	17438.7	Null	370	124191	QMD	371	127719
QMD+SL	320	16759	QMD+SL+WND	321	19183.5	SL	327	23545.7	TPH+QMD+SL	329	26135.9	QMD	338	35480.5	QMD+SL+WND	340	38275.5	TPH	331	31906.2	TPH+QMD+SL	333	34606.4	SL+TPH	312	15127.1	TPH+QMD+SL+WND	314	17442.3	QMD	371	124193	QMD+SL	372	127722
