# Supplementary material for: When a tree falls: Controls on wood decay predict standing dead tree fall and new risks in changing forests
Source: PLOS journal article supplement (doi:10.1371/journal.pone.0196712), 2018-05-09
Supplement: S6 (10.1371/journal.pone.0196712.s006) [file journal.pone.0196712.s006]

Observed Proportion Standing by Spatial Grid

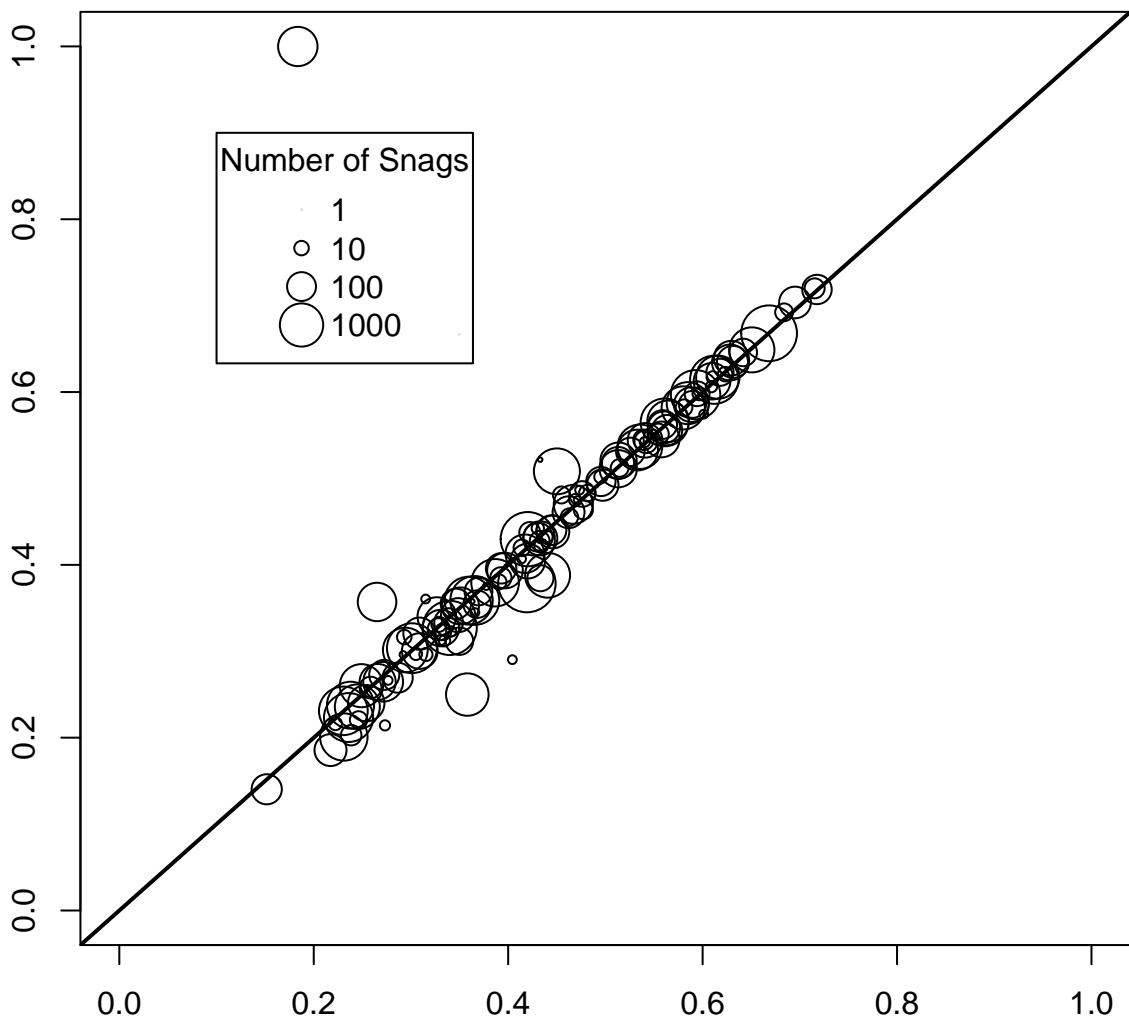

Predicted Proportion Standing by Spatial Grid
